# Supplementary material for: Unravelling the evolutionary dynamics of antibiotic resistance genes in the infant gut microbiota during the first four months of life
Source: PubMed Central journal article supplement (PMC11323388; doi:10.1186/s12941-024-00725-z), 2024-08-13

**A**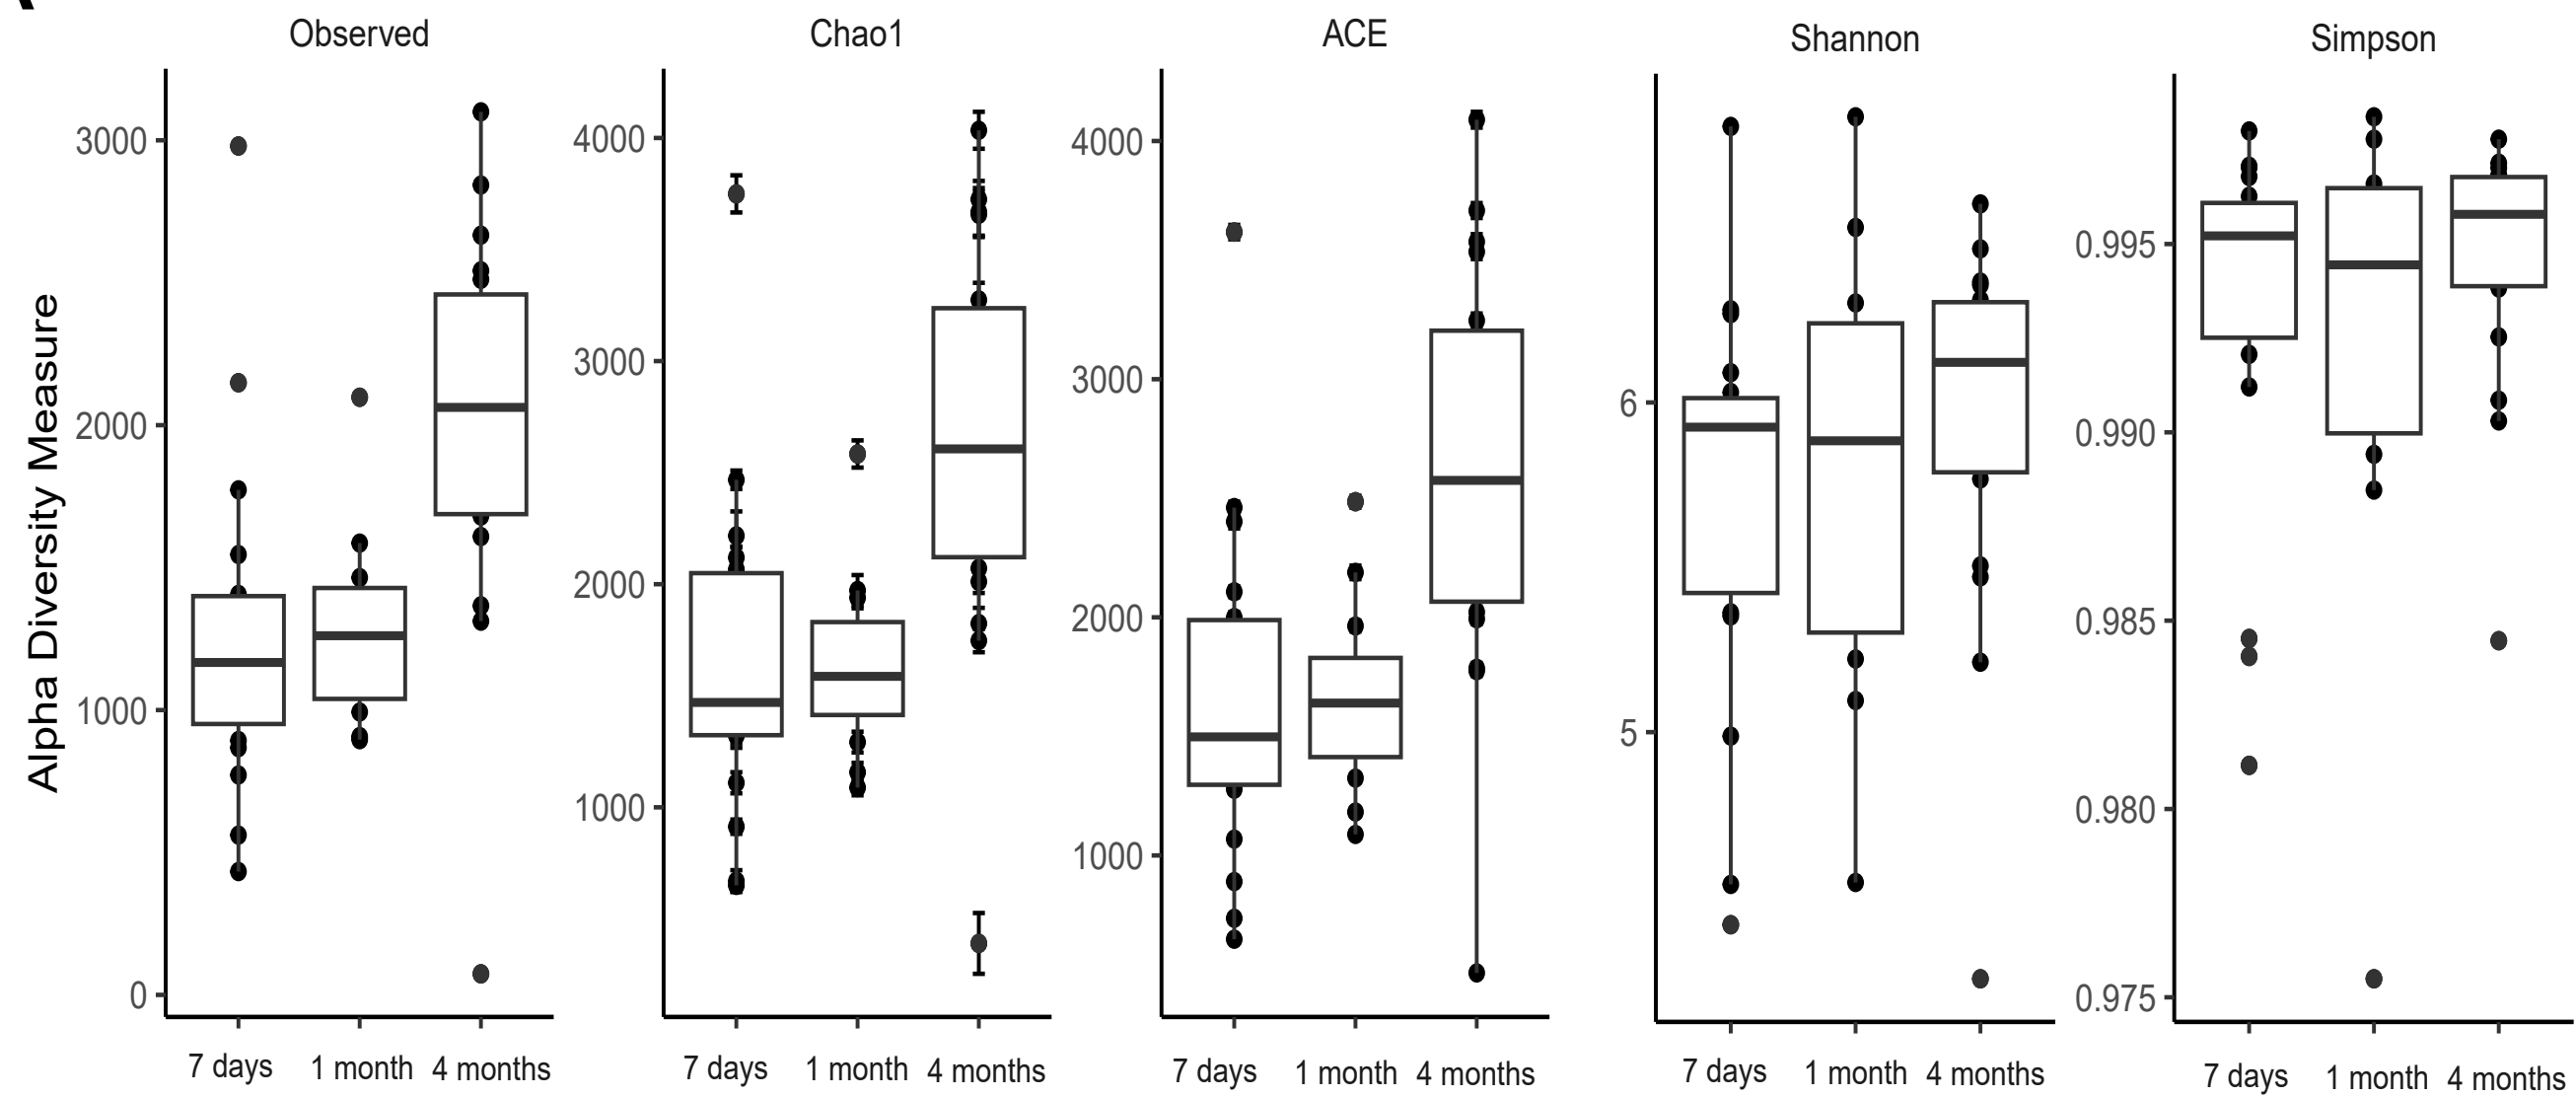**B**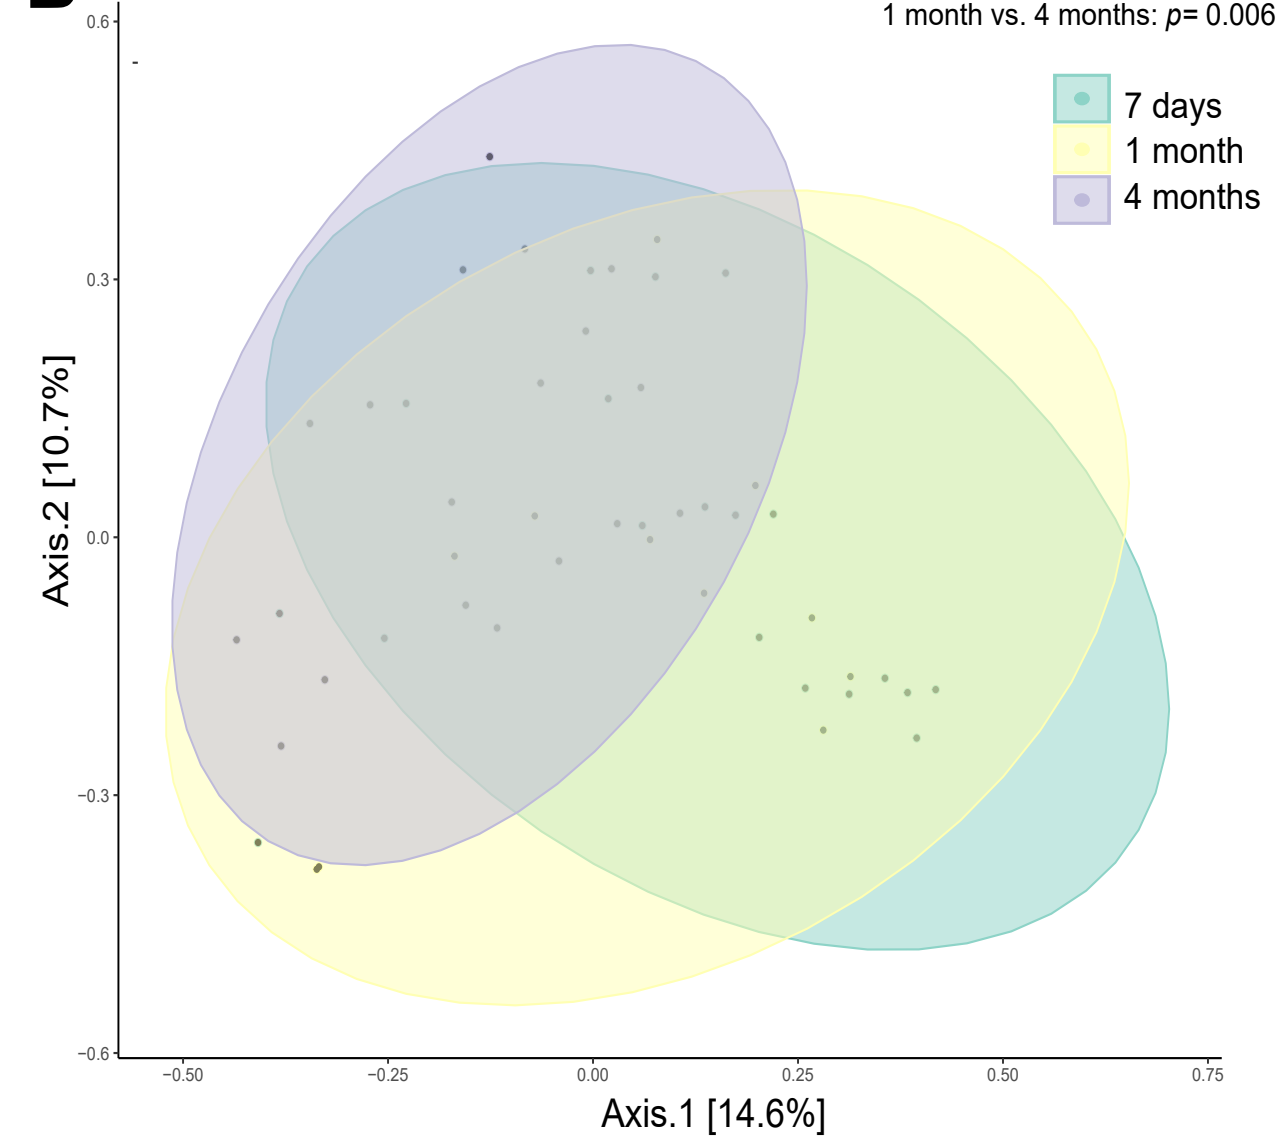**C**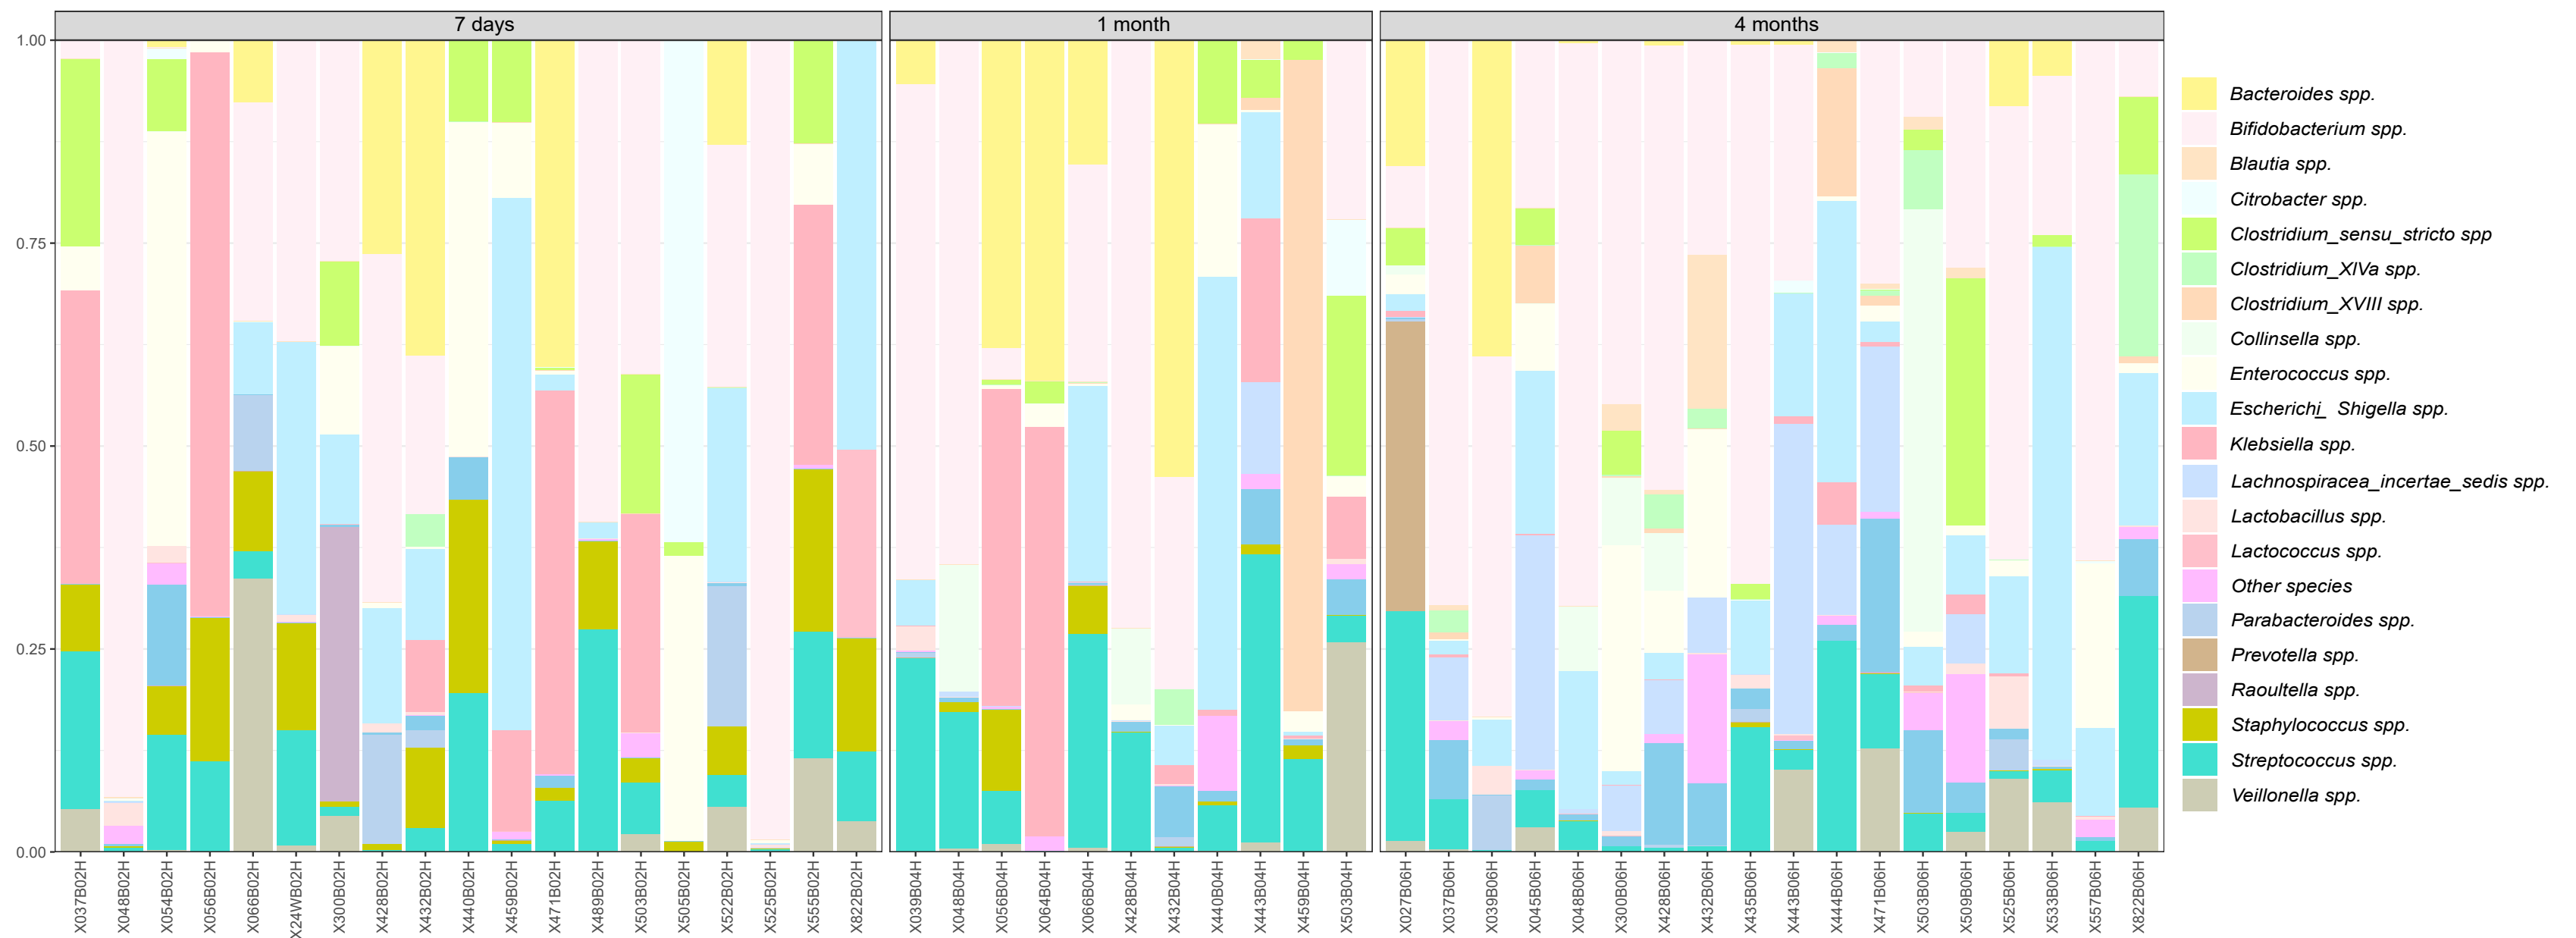

Supplement: 12941_2024_725_MOESM5_ESM.pdf [file 12941_2024_725_MOESM5_ESM.pdf]
